# Supplementary material for: Evolution in key indicators of maternal and child health across the wealth gradient in 41 sub-Saharan African countries, 1986–2019
Source: Springer Nature journal article supplement (doi:10.1186/s12916-023-03183-0), 2024-01-08
Supplement: MOESM1 [file 26606576]

## Additional File

### Evolution in key indicators of maternal and child health across the wealth gradient in 41 sub-Saharan African countries, 1986–2019

Yeeun Lee, Sarah Bolongaita, Ryoko Sato, Jesse Bump, Stéphane Verguet

**Table A1.** Countries presented with the indicators and years available.

| Country      | Indicators | Year(s)                      |
|--------------|------------|------------------------------|
| Angola       | ANC        | 2015                         |
|              | SBA        | 2006, 2015                   |
|              | Measles    | 2015                         |
|              | DPT1       | 2015                         |
|              | DPT3       | 2015                         |
|              | Fever      | 2006, 2011, 2015             |
|              | Diarrhea   | 2015                         |
|              | ARI        | –                            |
| Benin        | ANC        | 2001, 2006, 2012, 2017       |
|              | SBA        | 2001, 2006, 2012, 2017       |
|              | Measles    | 1996, 2001, 2006, 2012, 2017 |
|              | DPT1       | 1996, 2001, 2006, 2012, 2017 |
|              | DPT3       | 1996, 2001, 2006, 2012, 2017 |
|              | Fever      | 2001, 2006, 2012, 2017       |
|              | Diarrhea   | 2001, 2006, 2012, 2017       |
|              | ARI        | 2001                         |
| Botswana     | ANC        | –                            |
|              | SBA        | 1988                         |
|              | Measles    | 1988                         |
|              | DPT1       | 1988                         |
|              | DPT3       | 1988                         |
|              | Fever      | –                            |
|              | Diarrhea   | –                            |
|              | ARI        | –                            |
| Burkina Faso | ANC        | 1993, 1999, 2003, 2010, 2014 |
|              | SBA        | 1993, 1999, 2003, 2010       |
|              | Measles    | 1993, 1999, 2003, 2010       |

|                             |          |                                    |
|-----------------------------|----------|------------------------------------|
|                             | DPT1     | 1993, 1999, 2003, 2010             |
|                             | DPT3     | 1993, 1999, 2003, 2010             |
|                             | Fever    | 1993, 1999, 2003, 2010, 2014, 2017 |
|                             | Diarrhea | 1993, 1999, 2003, 2010             |
|                             | ARI      | 1993, 1999, 2003, 2010             |
| Burundi                     |          |                                    |
|                             | ANC      | 2010, 2016                         |
|                             | SBA      | 2010, 2016                         |
|                             | Measles  | 2010, 2016                         |
|                             | DPT1     | 2010, 2016                         |
|                             | DPT3     | 2010, 2016                         |
|                             | Fever    | 2010, 2012, 2016                   |
|                             | Diarrhea | 2010, 2016                         |
|                             | ARI      | 2010, 2016                         |
| Cameroon                    |          |                                    |
|                             | ANC      | 1991, 2004, 2011, 2018             |
|                             | SBA      | 1991, 2004, 2011, 2018             |
|                             | Measles  | 1991, 1998, 2004, 2011, 2018       |
|                             | DPT1     | 1991, 1998, 2004, 2011, 2018       |
|                             | DPT3     | 1991, 1998, 2004, 2011, 2018       |
|                             | Fever    | 1991, 2004, 2011, 2018             |
|                             | Diarrhea | 1991, 2004, 2011, 2018             |
|                             | ARI      | 2004, 2011                         |
| Central African<br>Republic |          |                                    |
|                             | ANC      | –                                  |
|                             | SBA      | –                                  |
|                             | Measles  | 1994                               |
|                             | DPT1     | 1994                               |
|                             | DPT3     | 1994                               |
|                             | Fever    | –                                  |
|                             | Diarrhea | –                                  |
|                             | ARI      | –                                  |
| Chad                        |          |                                    |
|                             | ANC      | 1997, 2004, 2014                   |
|                             | SBA      | 1997, 2004, 2014                   |
|                             | Measles  | 1997, 2004, 2014                   |
|                             | DPT1     | 1997, 2004, 2014                   |
|                             | DPT3     | 1997, 2004, 2014                   |
|                             | Fever    | 1997, 2004, 2014                   |
|                             | Diarrhea | 1997, 2004, 2014                   |

|                                     |          |                  |
|-------------------------------------|----------|------------------|
|                                     | ARI      | 1997, 2004, 2014 |
| Comoros                             | ANC      | 2012             |
|                                     | SBA      | 2012             |
|                                     | Measles  | 1996, 2012       |
|                                     | DPT1     | 1996, 2012       |
|                                     | DPT3     | 1996, 2012       |
|                                     | Fever    | 2012             |
|                                     | Diarrhea | 2012             |
|                                     | ARI      | –                |
| Congo                               | ANC      | 2005, 2011       |
|                                     | SBA      | 2005, 2011       |
|                                     | Measles  | 2005, 2011       |
|                                     | DPT1     | 2005, 2011       |
|                                     | DPT3     | 2005, 2011       |
|                                     | Fever    | 2005, 2011       |
|                                     | Diarrhea | 2005, 2011       |
|                                     | ARI      | 2011             |
| Democratic Republic<br>of the Congo | ANC      | 2007, 2013       |
|                                     | SBA      | 2007, 2013       |
|                                     | Measles  | 2007, 2013       |
|                                     | DPT1     | 2007, 2013       |
|                                     | DPT3     | 2007, 2013       |
|                                     | Fever    | 2007, 2013       |
|                                     | Diarrhea | 2007, 2013       |
|                                     | ARI      | –                |
| Cote d'Ivoire                       | ANC      | 1998, 2005, 2012 |
|                                     | SBA      | 1998, 2005, 2012 |
|                                     | Measles  | 1998, 2012       |
|                                     | DPT1     | 1994, 1998, 2012 |
|                                     | DPT3     | 1994, 1998, 2012 |
|                                     | Fever    | 1998, 2012       |
|                                     | Diarrhea | 1998, 2012       |
|                                     | ARI      | 2012             |
| Eritrea                             | ANC      | 2002             |
|                                     | SBA      | 2002             |

|          |          |                              |
|----------|----------|------------------------------|
|          | Measles  | 1995, 2002                   |
|          | DPT1     | 1995, 2002                   |
|          | DPT3     | 1995, 2002                   |
|          | Fever    | 2002                         |
|          | Diarrhea | 2002                         |
|          | ARI      | 2002                         |
| Eswatini |          |                              |
|          | ANC      | 2006                         |
|          | SBA      | 2006                         |
|          | Measles  | 2006                         |
|          | DPT1     | 2006                         |
|          | DPT3     | 2006                         |
|          | Fever    | 2006                         |
|          | Diarrhea | 2006                         |
|          | ARI      | –                            |
| Ethiopia |          |                              |
|          | ANC      | 2000, 2005, 2011, 2016, 2019 |
|          | SBA      | 2011, 2016, 2019             |
|          | Measles  | 2000, 2005, 2011, 2016, 2019 |
|          | DPT1     | 2000, 2005, 2011, 2016, 2019 |
|          | DPT3     | 2000, 2005, 2011, 2016, 2019 |
|          | Fever    | 2000, 2005, 2011, 2016       |
|          | Diarrhea | 2000, 2005, 2011, 2016       |
|          | ARI      | 2000, 2005, 2011, 2016       |
| Gabon    |          |                              |
|          | ANC      | 2000, 2012                   |
|          | SBA      | 2000, 2012                   |
|          | Measles  | 2000, 2012                   |
|          | DPT1     | 2000, 2012                   |
|          | DPT3     | 2000, 2012                   |
|          | Fever    | 2000, 2012                   |
|          | Diarrhea | 2000, 2012                   |
|          | ARI      | 2000                         |
| Gambia   |          |                              |
|          | ANC      | 2013, 2019                   |
|          | SBA      | 2013, 2019                   |
|          | Measles  | 2013, 2019                   |
|          | DPT1     | 2013, 2019                   |
|          | DPT3     | 2013, 2019                   |
|          | Fever    | 2013, 2019                   |



|         |          |                                    |
|---------|----------|------------------------------------|
|         | Diarrhea | 2013, 2019                         |
|         | ARI      | 2013, 2019                         |
| Ghana   |          |                                    |
|         | ANC      | 1998, 2003, 2008, 2014, 2019       |
|         | SBA      | 1998, 2003, 2008, 2014             |
|         | Measles  | 1993, 1998, 2003, 2008, 2014       |
|         | DPT1     | 1993, 1998, 2003, 2008, 2014       |
|         | DPT3     | 1993, 1998, 2003, 2008, 2014       |
|         | Fever    | 1998, 2003, 2008, 2014, 2016, 2019 |
|         | Diarrhea | 1998, 2003, 2008, 2014             |
|         | ARI      | 1998, 2003                         |
| Guinea  |          |                                    |
|         | ANC      | 1999, 2005, 2012, 2018             |
|         | SBA      | 1999, 2005, 2012, 2018             |
|         | Measles  | 1999, 2005, 2012, 2018             |
|         | DPT1     | 1999, 2005, 2012, 2018             |
|         | DPT3     | 1999, 2005, 2012, 2018             |
|         | Fever    | 1999, 2005, 2012, 2018             |
|         | Diarrhea | 1999, 2005, 2012, 2018             |
|         | ARI      | 1999, 2005, 2012                   |
| Kenya   |          |                                    |
|         | ANC      | 1993, 2003, 2008, 2014, 2015       |
|         | SBA      | 1993, 2003, 2008, 2014             |
|         | Measles  | 1993, 1998, 2003, 2008, 2014       |
|         | DPT1     | 1993, 1998, 2003, 2008, 2014       |
|         | DPT3     | 1993, 1998, 2003, 2008, 2014       |
|         | Fever    | 1993, 2003, 2008, 2014, 2015       |
|         | Diarrhea | 1993, 2003, 2008, 2014             |
|         | ARI      | 1993, 2003, 2008, 2014             |
| Lesotho |          |                                    |
|         | ANC      | 2004, 2009, 2014                   |
|         | SBA      | 2004, 2009, 2014                   |
|         | Measles  | 2004, 2009, 2014                   |
|         | DPT1     | 2004, 2009, 2014                   |
|         | DPT3     | 2004, 2009, 2014                   |
|         | Fever    | 2004, 2009, 2014                   |
|         | Diarrhea | 2004, 2009, 2014                   |
|         | ARI      | 2004                               |
| Liberia |          |                                    |
|         | ANC      | –                                  |

|            |          |                                                |
|------------|----------|------------------------------------------------|
|            | SBA      | 2007, 2013, 2019                               |
|            | Measles  | 2007, 2013, 2016, 2019                         |
|            | DPT1     | 2007, 2013, 2016, 2019                         |
|            | DPT3     | 2007, 2013, 2016, 2019                         |
|            | Fever    | 2007, 2009, 2011, 2013, 2016, 2019             |
|            | Diarrhea | 2007, 2013, 2019                               |
|            | ARI      | 2007                                           |
| Madagascar | ANC      | –                                              |
|            | SBA      | 2004, 2008                                     |
|            | Measles  | 1997, 2004, 2008                               |
|            | DPT1     | 1997, 2004, 2008                               |
|            | DPT3     | 1997, 2004, 2008                               |
|            | Fever    | 2004, 2008, 2011, 2013, 2016                   |
|            | Diarrhea | 2004, 2008                                     |
|            | ARI      | 2004, 2008                                     |
| Malawi     | ANC      | –                                              |
|            | SBA      | 1992, 2000, 2004, 2010, 2015                   |
|            | Measles  | 1992, 2000, 2004, 2010, 2015                   |
|            | DPT1     | 1992, 2000, 2004, 2010, 2015                   |
|            | DPT3     | 1992, 2000, 2004, 2010, 2015                   |
|            | Fever    | 1992, 2000, 2004, 2010, 2012, 2014, 2015, 2017 |
|            | Diarrhea | 1992, 2000, 2004, 2010, 2015                   |
|            | ARI      | 1992, 2000, 2004, 2010, 2015                   |
| Mali       | ANC      | –                                              |
|            | SBA      | 2001, 2006, 2012, 2018                         |
|            | Measles  | 1996, 2001, 2006, 2012, 2018                   |
|            | DPT1     | 1996, 2001, 2006, 2012, 2018                   |
|            | DPT3     | 1996, 2001, 2006, 2012, 2018                   |
|            | Fever    | 2001, 2006, 2012, 2015, 2018                   |
|            | Diarrhea | 2001, 2006, 2012, 2018                         |
|            | ARI      | 2001                                           |
| Mauritania | ANC      | –                                              |
|            | SBA      | 2000                                           |
|            | Measles  | 2000                                           |
|            | DPT1     | 2000                                           |
|            | DPT3     | 2000                                           |

|            |          |                                          |
|------------|----------|------------------------------------------|
|            | Fever    | 2000                                     |
|            | Diarrhea | 2000                                     |
|            | ARI      | 2000                                     |
| Mozambique |          |                                          |
|            | ANC      | –                                        |
|            | SBA      | 2003, 2011                               |
|            | Measles  | 1997, 2003, 2011, 2015                   |
|            | DPT1     | 1997, 2003, 2011, 2015                   |
|            | DPT3     | 1997, 2003, 2011, 2015                   |
|            | Fever    | 2003, 2011, 2015, 2018                   |
|            | Diarrhea | 2003, 2011, 2015                         |
|            | ARI      | 2003, 2015                               |
| Namibia    |          |                                          |
|            | ANC      | 1992, 2000, 2006, 2013                   |
|            | SBA      | 1992, 2000, 2006, 2013                   |
|            | Measles  | 1992, 2000, 2006, 2013                   |
|            | DPT1     | 1992, 2000, 2006, 2013                   |
|            | DPT3     | 1992, 2000, 2006, 2013                   |
|            | Fever    | 1992, 2000, 2006, 2013                   |
|            | Diarrhea | 1992, 2000, 2006, 2013                   |
|            | ARI      | 1992, 2000                               |
| Niger      |          |                                          |
|            | ANC      | 2006, 2012                               |
|            | SBA      | 2006, 2012                               |
|            | Measles  | 2006, 2012                               |
|            | DPT1     | 1998, 2006, 2012                         |
|            | DPT3     | 1998, 2006, 2012                         |
|            | Fever    | 2006, 2012                               |
|            | Diarrhea | 2006, 2012                               |
|            | ARI      | 2012                                     |
| Nigeria    |          |                                          |
|            | ANC      | 1990, 2003, 2008, 2013, 2018             |
|            | SBA      | 1990, 2003, 2008, 2013, 2018             |
|            | Measles  | 1990, 2003, 2008, 2013, 2018             |
|            | DPT1     | 1990, 2003, 2008, 2013, 2018             |
|            | DPT3     | 1990, 2003, 2008, 2013, 2018             |
|            | Fever    | 1990, 2003, 2008, 2010, 2013, 2015, 2018 |
|            | Diarrhea | 1990, 2003, 2008, 2013, 2018             |
|            | ARI      | 1990, 2003, 2008, 2013, 2018             |

|                       |          |                                                |
|-----------------------|----------|------------------------------------------------|
| Rwanda                | ANC      | 1992, 2000, 2005, 2008, 2010, 2015, 2019       |
|                       | SBA      | 1992, 2000, 2005, 2008, 2010, 2015             |
|                       | Measles  | 1992, 2000, 2005, 2008, 2010, 2015             |
|                       | DPT1     | 1992, 2000, 2005, 2008, 2010, 2015             |
|                       | DPT3     | 1992, 2000, 2005, 2008, 2010, 2015             |
|                       | Fever    | 1992, 2000, 2005, 2008, 2010, 2013, 2015, 2017 |
|                       | Diarrhea | 1992, 2000, 2005, 2008, 2010, 2015             |
|                       | ARI      | 1992, 2000, 2005, 2008, 2010, 2015             |
| Sao Tome and Principe | ANC      | 2008                                           |
|                       | SBA      | 2008                                           |
|                       | Measles  | 2008                                           |
|                       | DPT1     | 2008                                           |
|                       | DPT3     | 2008                                           |
|                       | Fever    | 2008                                           |
|                       | Diarrhea | 2008                                           |
|                       | ARI      | –                                              |
| Senegal               | ANC      | 1997, 2005, 2010, 2012, 2014-2019              |
|                       | SBA      | 1997, 2005, 2010, 2012, 2014-2019              |
|                       | Measles  | 2005, 2010, 2012, 2014-2019                    |
|                       | DPT1     | 2005, 2010, 2012, 2014-2019                    |
|                       | DPT3     | 2005, 2010, 2012, 2014-2019                    |
|                       | Fever    | 2005, 2006, 2008, 2010, 2012, 2014-2019        |
|                       | Diarrhea | 1997, 2005, 2010, 2012, 2014-2019              |
|                       | ARI      | 2005, 2010, 2017                               |
| Sierra Leone          | ANC      | 2008, 2013                                     |
|                       | SBA      | 2008, 2013, 2019                               |
|                       | Measles  | 2008, 2013, 2019                               |
|                       | DPT1     | 2008, 2013, 2019                               |
|                       | DPT3     | 2008, 2013, 2019                               |
|                       | Fever    | 2008, 2013, 2016, 2019                         |
|                       | Diarrhea | 2008, 2013, 2019                               |
|                       | ARI      | 2008, 2013                                     |
| South Africa          | ANC      | 1998, 2016                                     |
|                       | SBA      | 1998, 2016                                     |
|                       | Measles  | 1998, 2016                                     |

|          |          |                                          |
|----------|----------|------------------------------------------|
|          | DPT1     | 1998, 2016                               |
|          | DPT3     | 1998, 2016                               |
|          | Fever    | 2016                                     |
|          | Diarrhea | 1998                                     |
|          | ARI      | 1998                                     |
| Sudan    |          |                                          |
|          | ANC      | –                                        |
|          | SBA      | 1990                                     |
|          | Measles  | 1990                                     |
|          | DPT1     | 1990                                     |
|          | DPT3     | 1990                                     |
|          | Fever    | –                                        |
|          | Diarrhea | –                                        |
|          | ARI      | –                                        |
| Tanzania |          |                                          |
|          | ANC      | 1996, 1999, 2004, 2010, 2015, 2017       |
|          | SBA      | 1996, 1999, 2004, 2010, 2012, 2015       |
|          | Measles  | 1996, 1999, 2004, 2010, 2015             |
|          | DPT1     | 1996, 1999, 2004, 2010, 2015             |
|          | DPT3     | 1996, 1999, 2004, 2010, 2015             |
|          | Fever    | 1996, 2004, 2007, 2010, 2012, 2015, 2017 |
|          | Diarrhea | 1996, 2004, 2010, 2015                   |
|          | ARI      | 1996, 2004, 2010, 2015                   |
| Togo     |          |                                          |
|          | ANC      | 2013                                     |
|          | SBA      | 2013                                     |
|          | Measles  | 1998, 2013                               |
|          | DPT1     | 1998, 2013                               |
|          | DPT3     | 1998, 2013                               |
|          | Fever    | 2013, 2017                               |
|          | Diarrhea | 2013                                     |
|          | ARI      | –                                        |
| Uganda   |          |                                          |
|          | ANC      | 2000, 2006, 2011, 2016, 2018             |
|          | SBA      | 2000, 2006, 2011, 2016                   |
|          | Measles  | 1995, 2000, 2006, 2011, 2016             |
|          | DPT1     | 1995, 2000, 2006, 2011, 2016             |
|          | DPT3     | 1995, 2000, 2006, 2011, 2016             |
|          | Fever    | 2000, 2006, 2009, 2011, 2014, 2016, 2018 |
|          | Diarrhea | 2000, 2006, 2011, 2016                   |

|          |          |                              |
|----------|----------|------------------------------|
|          | ARI      | 2000, 2006, 2011, 2016       |
| Zambia   | ANC      | 1996, 2002, 2007, 2013, 2018 |
|          | SBA      | 1996, 2002, 2007, 2013, 2018 |
|          | Measles  | 1996, 2002, 2007, 2013, 2018 |
|          | DPT1     | 1996, 2002, 2007, 2013, 2018 |
|          | DPT3     | 1996, 2002, 2007, 2013, 2018 |
|          | Fever    | 1996, 2002, 2007, 2013, 2018 |
|          | Diarrhea | 1996, 2002, 2007, 2013, 2018 |
|          | ARI      | 1996, 2002, 2007, 2013       |
| Zimbabwe | ANC      | 1999, 2005, 2010, 2015       |
|          | SBA      | 1999, 2005, 2010, 2015       |
|          | Measles  | 1994, 1999, 2005, 2010, 2015 |
|          | DPT1     | 1994, 1999, 2005, 2010, 2015 |
|          | DPT3     | 1994, 1999, 2005, 2010, 2015 |
|          | Fever    | 1999, 2005, 2010, 2015       |
|          | Diarrhea | 1999, 2005, 2010, 2015       |
|          | ARI      | 1999                         |

---

*DPT1* First-dose Diphtheria, Tetanus, Pertussis; *DPT3* Third-dose Diphtheria, Tetanus, Pertussis  
*ANC* Antenatal Care; *ARI* Acute Respiratory Infection; *SBA* Skilled Birth Attendance

**Table A2.** Summary measures of coverage by 5-year intervals.

| Indicator | Years     | Mean  | Median | Range<br>(minimum,<br>maximum) | Range<br>(quartile 1,<br>quartile 3) | SD   |
|-----------|-----------|-------|--------|--------------------------------|--------------------------------------|------|
|           |           | (%)   | (%)    | (%)                            | (%)                                  | (%)  |
| ANC       |           |       |        |                                |                                      |      |
|           | 1986-1990 | 52.4  | 51.9   | (26.6, 85.4)                   | (36.0, 62.0)                         | 19.0 |
|           | 1991-1995 | 44.7  | 47.7   | (8.0, 86.9)                    | (24.9, 62.6)                         | 21.9 |
|           | 1996-2000 | 45.1  | 48.9   | (3.4, 87.6)                    | (22.8, 65.4)                         | 23.9 |
|           | 2001-2005 | 48.0  | 51.6   | (1.5, 93.6)                    | (30.0, 66.4)                         | 22.8 |
|           | 2006-2010 | 51.0  | 49.3   | (8.60, 94.7)                   | (36.0, 64.6)                         | 18.9 |
|           | 2011-2015 | 55.8  | 54.1   | (6.8, 98.1)                    | (44.0, 71.8)                         | 18.2 |
|           | 2016-2019 | 59.8  | 58.7   | (17.9, 98.9)                   | (47.8, 75.4)                         | 18.3 |
| SBA       |           |       |        |                                |                                      |      |
|           | 1986-1990 | 42.1  | 40.1   | (11.5, 78.9)                   | (25.0, 57.5)                         | 20.5 |
|           | 1991-1995 | 47.8  | 46.1   | (5.0, 96.0)                    | (28.4, 64.0)                         | 22.3 |
|           | 1996-2000 | 49.8  | 46.9   | (1.9, 98.7)                    | (27.0, 73.1)                         | 26.6 |
|           | 2001-2005 | 46.3  | 42.5   | (1.0, 99.3)                    | (27.5, 66.5)                         | 25.5 |
|           | 2006-2010 | 58.6  | 61.0   | (5.0, 98.2)                    | (39.9, 78.5)                         | 24.0 |
|           | 2011-2015 | 64.4  | 66.5   | (2.1, 99.3)                    | (48.0, 87.6)                         | 25.5 |
|           | 2016-2019 | 72.9  | 79.6   | (11.0, 100)                    | (60.0, 89.3)                         | 22.1 |
| Measles   |           |       |        |                                |                                      |      |
|           | 1986-1990 | 43.56 | 42.7   | (8.7, 72.0)                    | (33.3, 54.1)                         | 18.3 |
|           | 1991-1995 | 67.84 | 69     | (23.4, 93.2)                   | (53.3, 84.1)                         | 18.4 |
|           | 1996-2000 | 62.76 | 65.05  | (12.0, 95.2)                   | (46.0, 80.9)                         | 21.2 |
|           | 2001-2005 | 66.24 | 71.1   | (8.2, 96.4)                    | (54.3, 83.2)                         | 20.2 |
|           | 2006-2010 | 77.49 | 82.45  | (17.3, 97.4)                   | (67.0, 90.2)                         | 16.4 |
|           | 2011-2015 | 76.35 | 78.15  | (13.2, 99.3)                   | (70.0, 87.1)                         | 14.0 |
|           | 2016-2019 | 74.82 | 78.5   | (27.3, 97.4)                   | (65.7, 87.4)                         | 16.3 |
| DPT1      |           |       |        |                                |                                      |      |
|           | 1986-1990 | 55.48 | 60.9   | (9.9, 86.6)                    | (44.6, 69.5)                         | 20.2 |
|           | 1991-1995 | 82.28 | 87.5   | (32.2, 99.0)                   | (75.9, 94.5)                         | 15.7 |
|           | 1996-2000 | 78.89 | 83.8   | (18.8, 99.6)                   | (69.8, 94.3)                         | 18.7 |
|           | 2001-2005 | 80.95 | 87.75  | (15.9, 99.7)                   | (72.4, 93.9)                         | 18.1 |
|           | 2006-2010 | 87.86 | 93.75  | (22.6, 100.0)                  | (84.2, 96.4)                         | 13.8 |
|           | 2011-2015 | 87.56 | 92.15  | (14.2, 100.0)                  | (83.8, 96.8)                         | 13.6 |
|           | 2016-2019 | 88.21 | 93.3   | (40.2, 100.0)                  | (83.2, 96.9)                         | 12.8 |

|          |           |       |       |              |              |      |
|----------|-----------|-------|-------|--------------|--------------|------|
| DPT3     |           |       |       |              |              |      |
|          | 1986-1990 | 36.37 | 30.5  | (3.3, 71.7)  | (21.3, 56.2) | 22.0 |
|          | 1991-1995 | 64.48 | 67.9  | (20.3, 93.8) | (46.8, 86.2) | 21.8 |
|          | 1996-2000 | 59.34 | 65.1  | (8.5, 95.7)  | (40.7, 80.9) | 24.3 |
|          | 2001-2005 | 65.18 | 72.15 | (4.7, 96.8)  | (54.1, 82.5) | 22.7 |
|          | 2006-2010 | 75.99 | 83.45 | (8.2, 98.7)  | (66.4, 90.7) | 19.3 |
|          | 2011-2015 | 74.1  | 79.4  | (7.0, 100.0) | (65.8, 87.9) | 18.9 |
|          | 2016-2019 | 75.54 | 78.05 | (24.7, 99.7) | (65.6, 92.9) | 17.8 |
| Fever    |           |       |       |              |              |      |
|          | 1986-1990 | 67.05 | 67.8  | (51.5, 84.8) | (58.0, 72.4) | 10.9 |
|          | 1991-1995 | 51.84 | 55.55 | (16.4, 79.3) | (40.1, 79.3) | 16.7 |
|          | 1996-2000 | 34.62 | 28.55 | (3.5, 94.2)  | (19.9, 44.5) | 19.5 |
|          | 2001-2005 | 55.97 | 57.1  | (10.9, 94.7) | (42.9, 69.9) | 17.5 |
|          | 2006-2010 | 64.41 | 64.5  | (33.0, 93.7) | (55.5, 75.1) | 13.5 |
|          | 2011-2015 | 63.23 | 64.5  | (17.3, 92.9) | (54.4, 73.4) | 13.9 |
|          | 2016-2019 | 65.9  | 68.5  | (23.8, 95.2) | (56.2, 76.0) | 13.7 |
| Diarrhea |           |       |       |              |              |      |
|          | 1986-1990 | 44.25 | 42.25 | (32.2, 59.2) | (37.2, 48.6) | 8.8  |
|          | 1991-1995 | 44.18 | 40.25 | (17.2, 77.4) | (31.8, 58.1) | 16.2 |
|          | 1996-2000 | 43.58 | 44.65 | (15.5, 72.8) | (33.0, 53.5) | 13.3 |
|          | 2001-2005 | 40.81 | 40.95 | (15.5, 65.7) | (32.4, 50.2) | 12.1 |
|          | 2006-2010 | 54.56 | 57.45 | (18.2, 83.2) | (40.7, 65.8) | 15.2 |
|          | 2011-2015 | 57.45 | 56.7  | (23.7, 82.6) | (49.3, 67.4) | 11.5 |
|          | 2016-2019 | 57.2  | 57.6  | (28.2, 81.4) | (46.8, 66.9) | 12.3 |
| ARI      |           |       |       |              |              |      |
|          | 1986-1990 | 66.6  | 66.35 | (53.5, 81.1) | (63.1, 69.1) | 8.2  |
|          | 1991-1995 | 58.27 | 62.2  | (19.6, 92.9) | (41.3, 72.7) | 18.3 |
|          | 1996-2000 | 56.2  | 56.3  | (11.5, 95.2) | (42.6, 73.1) | 19.7 |
|          | 2001-2005 | 60.28 | 63.2  | (12.6, 94.2) | (48.8, 73.0) | 18.0 |
|          | 2006-2010 | 66.71 | 68.15 | (23.4, 94.1) | (56.7, 77.6) | 14.5 |
|          | 2011-2015 | 64.43 | 67.1  | (16.7, 97.0) | (54.6, 75.2) | 15.4 |
|          | 2016-2019 | 65.16 | 68.1  | (23.6, 96.9) | (54.4, 78.2) | 16.6 |

---

*DPT1* First-dose Diphtheria, Tetanus, Pertussis; *DPT3* Third-dose Diphtheria, Tetanus, Pertussis  
*ANC* Antenatal Care; *ARI* Acute Respiratory Infection; *SBA* Skilled Birth Attendance



**Table A3.** Linear model output by indicator and quintile.

| <b>Indicator</b> | <b>Quintile</b> | <b>Coefficient</b> | <b>Std. Error</b> | <b>P-value</b> | <b>R-squared</b> |
|------------------|-----------------|--------------------|-------------------|----------------|------------------|
| ANC              |                 |                    |                   |                |                  |
|                  | I               | 0.007              | 0.002             | 0.001          | 0.077            |
|                  | II              | 0.007              | 0.002             | 0.000          | 0.084            |
|                  | III             | 0.007              | 0.002             | 0.000          | 0.086            |
|                  | IV              | 0.006              | 0.002             | 0.002          | 0.065            |
|                  | V               | 0.004              | 0.002             | 0.029          | 0.032            |
| SBA              |                 |                    |                   |                |                  |
|                  | I               | 0.012              | 0.002             | 0.000          | 0.173            |
|                  | II              | 0.013              | 0.002             | 0.000          | 0.213            |
|                  | III             | 0.014              | 0.002             | 0.000          | 0.222            |
|                  | IV              | 0.011              | 0.002             | 0.000          | 0.161            |
|                  | V               | 0.005              | 0.001             | 0.000          | 0.117            |
| Measles          |                 |                    |                   |                |                  |
|                  | I               | 0.009              | 0.002             | 0.000          | 0.104            |
|                  | II              | 0.007              | 0.002             | 0.000          | 0.089            |
|                  | III             | 0.008              | 0.002             | 0.000          | 0.116            |
|                  | IV              | 0.006              | 0.002             | 0.001          | 0.076            |
|                  | V               | 0.003              | 0.001             | 0.036          | 0.033            |
| DPT1             |                 |                    |                   |                |                  |
|                  | I               | 0.006              | 0.002             | 0.006          | 0.055            |
|                  | II              | 0.006              | 0.002             | 0.002          | 0.069            |
|                  | III             | 0.005              | 0.002             | 0.001          | 0.077            |
|                  | IV              | 0.004              | 0.001             | 0.004          | 0.062            |
|                  | V               | 0.001              | 0.001             | 0.098          | 0.020            |
| DPT3             |                 |                    |                   |                |                  |
|                  | I               | 0.010              | 0.003             | 0.000          | 0.108            |
|                  | II              | 0.010              | 0.002             | 0.000          | 0.105            |
|                  | III             | 0.010              | 0.002             | 0.000          | 0.122            |
|                  | IV              | 0.007              | 0.002             | 0.000          | 0.087            |
|                  | V               | 0.003              | 0.001             | 0.052          | 0.028            |
| Fever            |                 |                    |                   |                |                  |
|                  | I               | 0.011              | 0.002             | 0.000          | 0.212            |
|                  | II              | 0.012              | 0.002             | 0.000          | 0.228            |

|          |     |       |       |       |       |
|----------|-----|-------|-------|-------|-------|
|          | III | 0.012 | 0.002 | 0.000 | 0.227 |
|          | IV  | 0.011 | 0.002 | 0.000 | 0.215 |
|          | V   | 0.009 | 0.001 | 0.000 | 0.212 |
| Diarrhea |     |       |       |       |       |
|          | I   | 0.009 | 0.001 | 0.000 | 0.206 |
|          | II  | 0.008 | 0.002 | 0.000 | 0.186 |
|          | III | 0.009 | 0.002 | 0.000 | 0.184 |
|          | IV  | 0.007 | 0.001 | 0.000 | 0.129 |
|          | V   | 0.006 | 0.001 | 0.000 | 0.139 |
| ARI      |     |       |       |       |       |
|          | I   | 0.005 | 0.002 | 0.006 | 0.059 |
|          | II  | 0.005 | 0.002 | 0.005 | 0.061 |
|          | III | 0.003 | 0.002 | 0.144 | 0.018 |
|          | IV  | 0.003 | 0.002 | 0.100 | 0.023 |
|          | V   | 0.003 | 0.002 | 0.055 | 0.034 |

---

*DPT1* First-dose Diphtheria, Tetanus, Pertussis; *DPT3* Third-dose Diphtheria, Tetanus, Pertussis  
*ANC* Antenatal Care; *ARI* Acute Respiratory Infection; *SBA* Skilled Birth Attendance

**Figure A1.** Trends by indicator for the six most populated countries in sub-Saharan Africa.

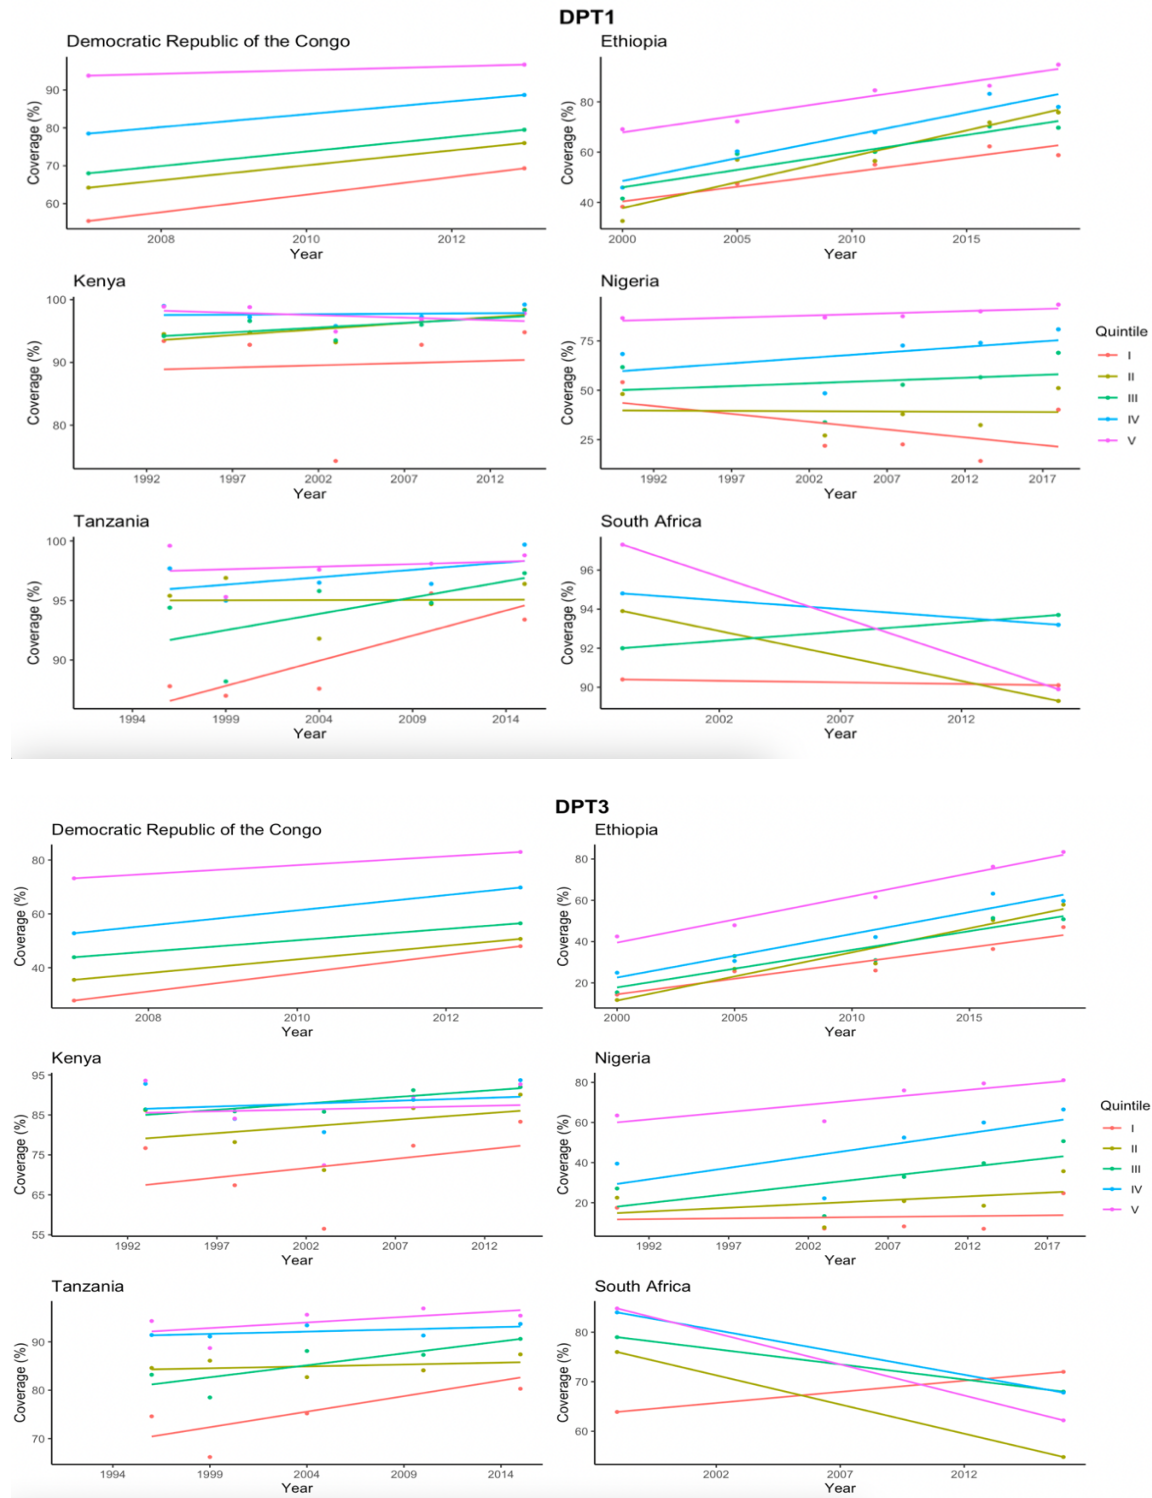

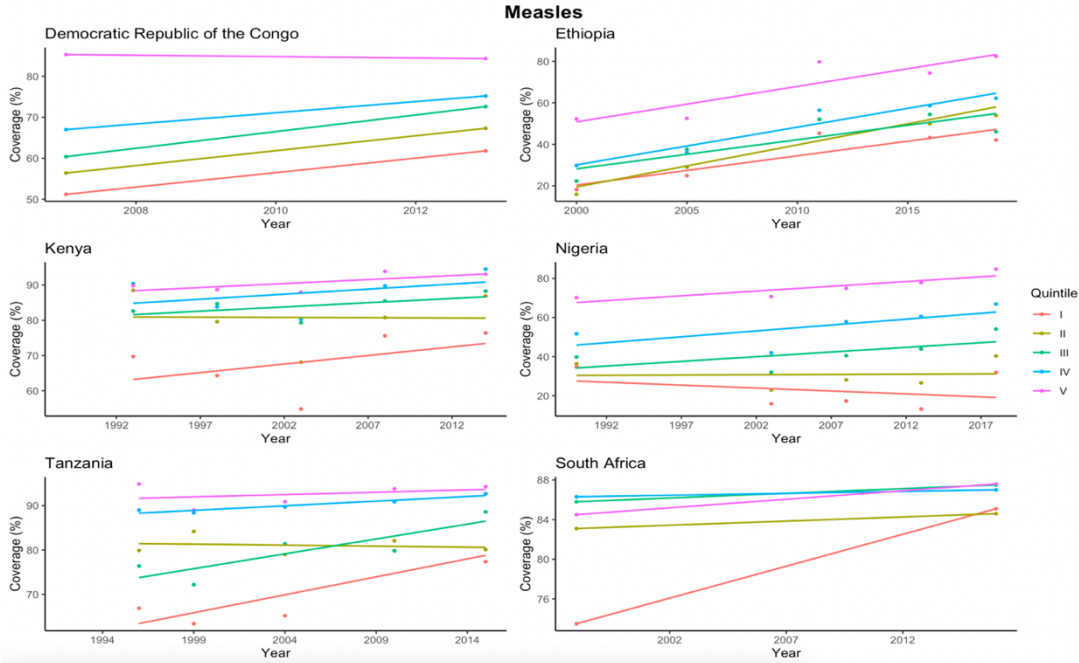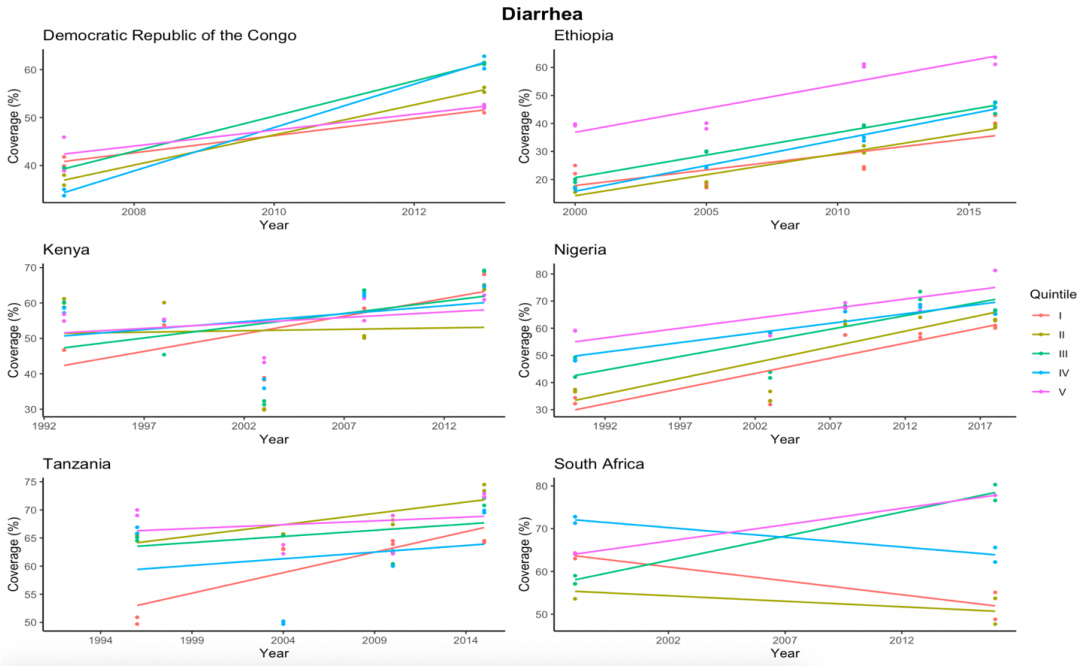

### Skilled Birth Attendance

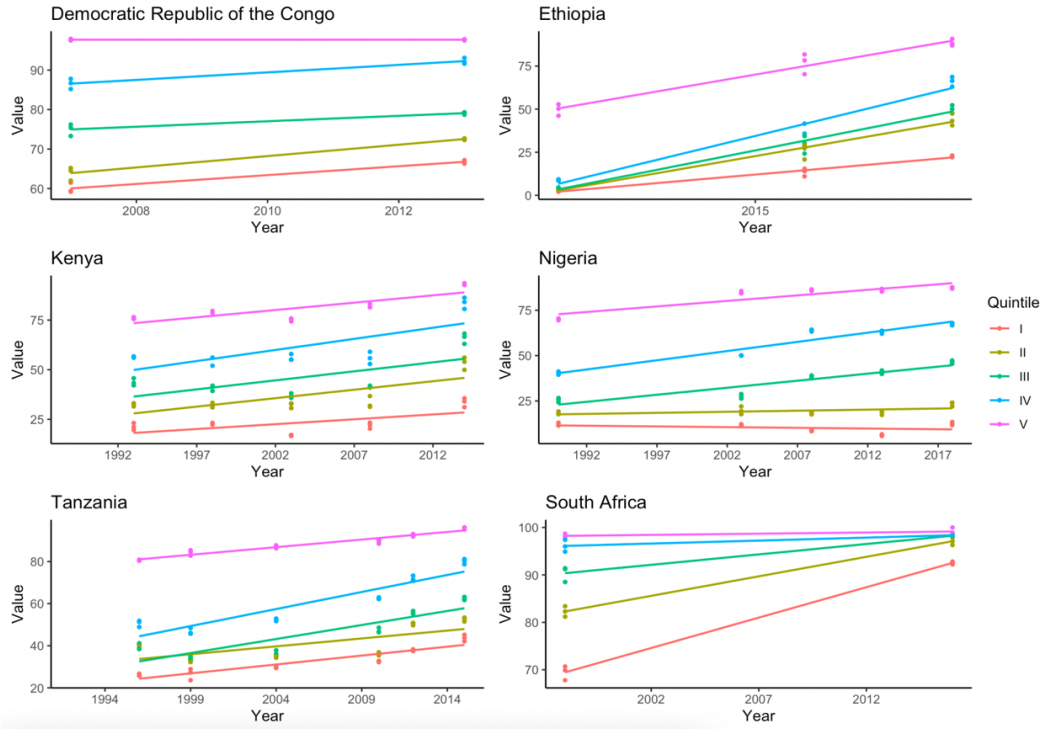

### Antenatal Care

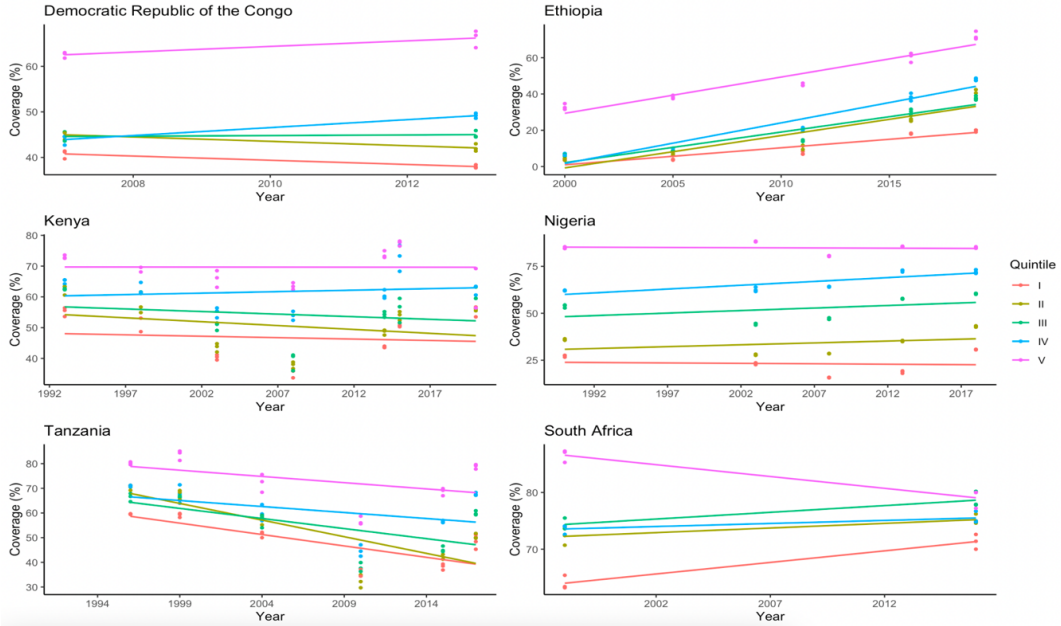



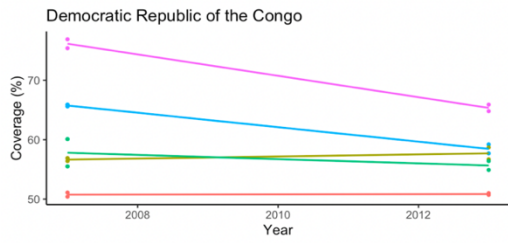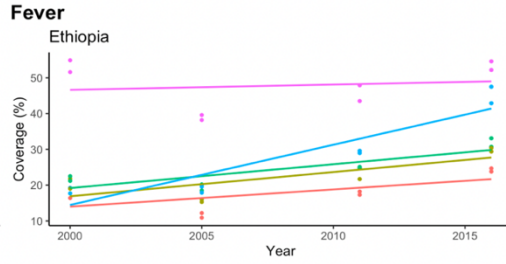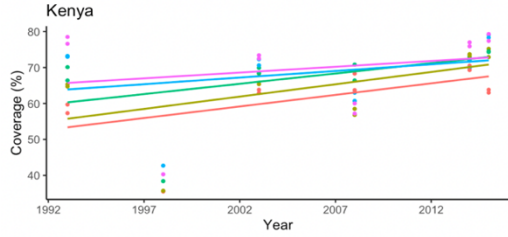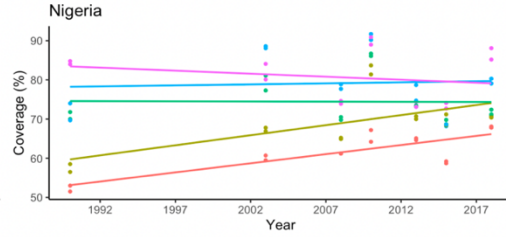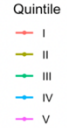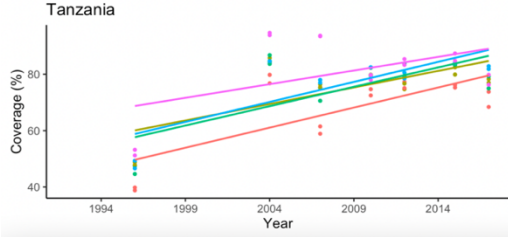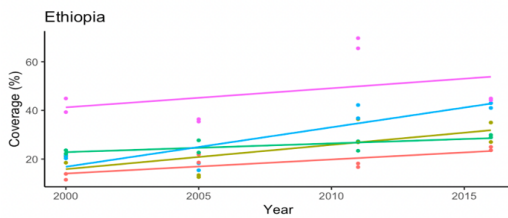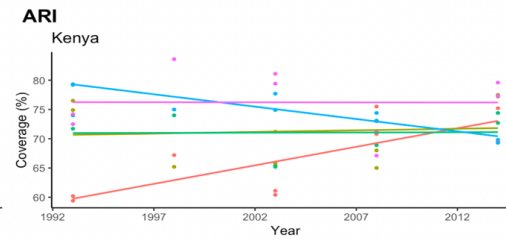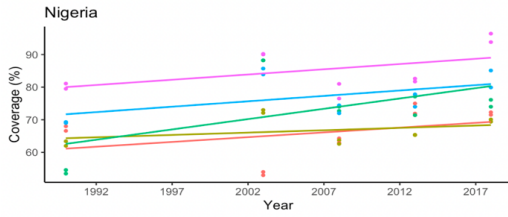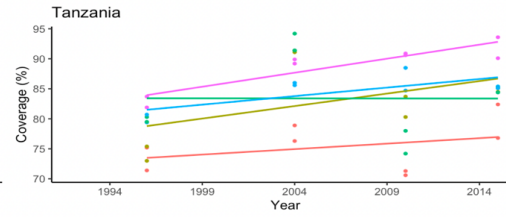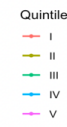

**Figure A2.** Rate of change in coverage for the bottom quintile for eight indicators in sub-Saharan Africa from 1986 to 2019. All countries included present two or more surveys.

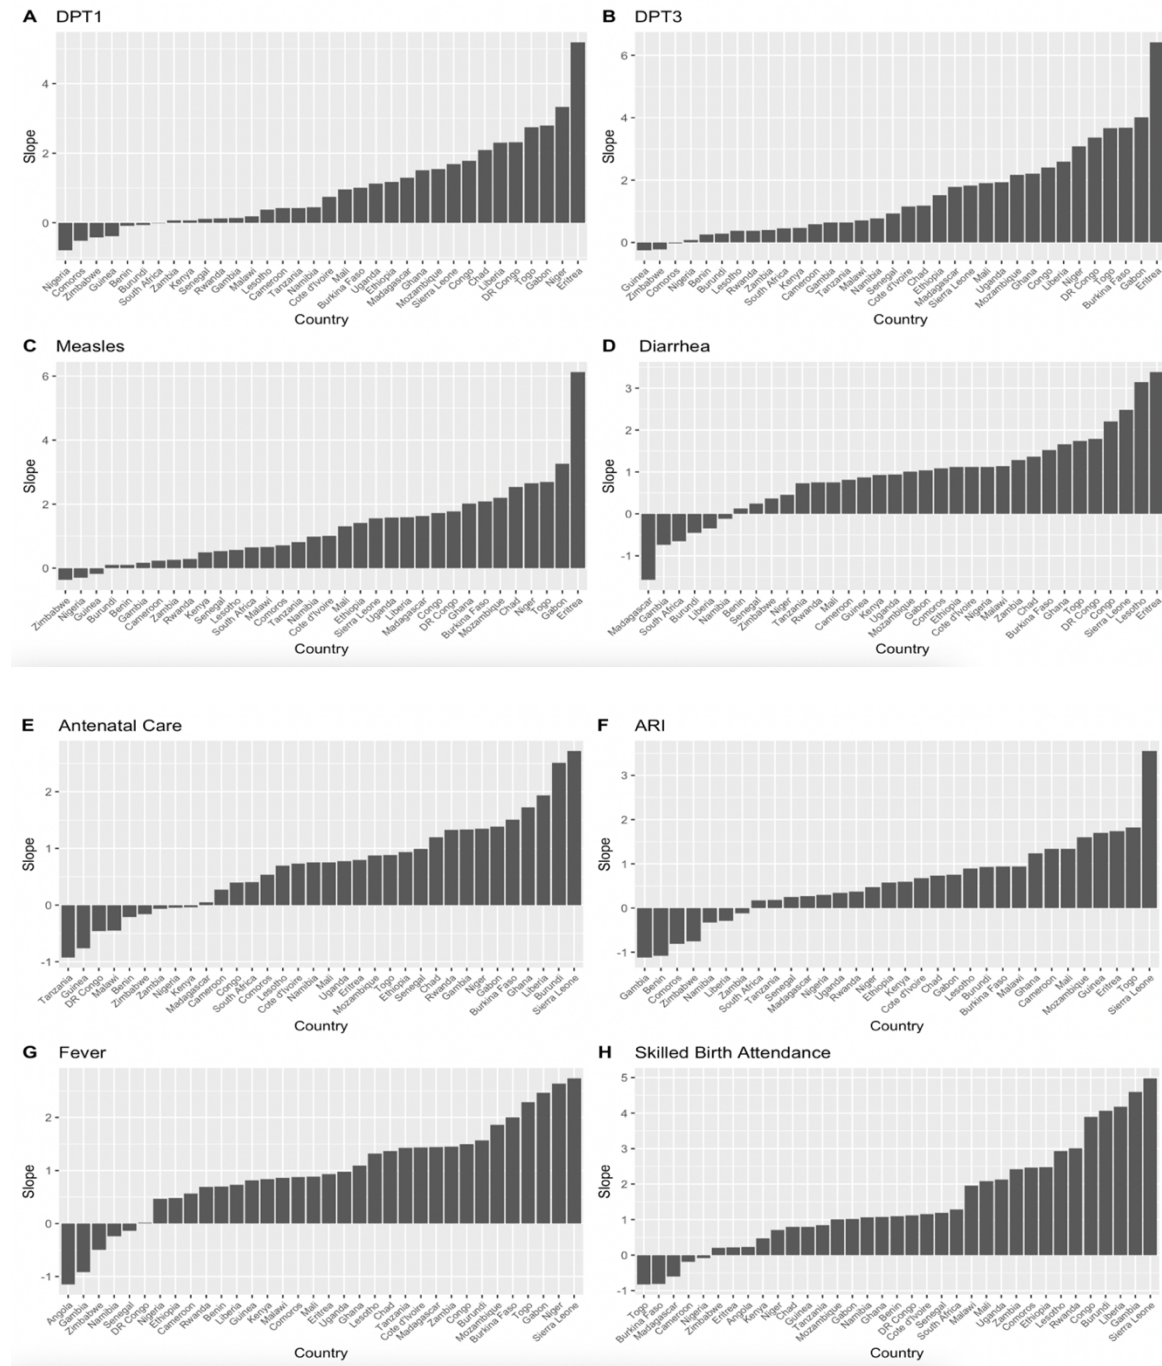

Slope: Average percentage point change between 1986 and 2019 for those in the bottom quintile from 1986 and 2019.

*DPT1* First-dose Diphtheria, Tetanus, Pertussis; *DPT3* Third-dose Diphtheria, Tetanus, Pertussis  
*ANC* Antenatal Care; *ARI* Acute Respiratory Infection; *SBA* Skilled Birth Attendance

**Figure A3.** Absolute differences and trends for eight indicators in sub-Saharan Africa, 1986-2019.

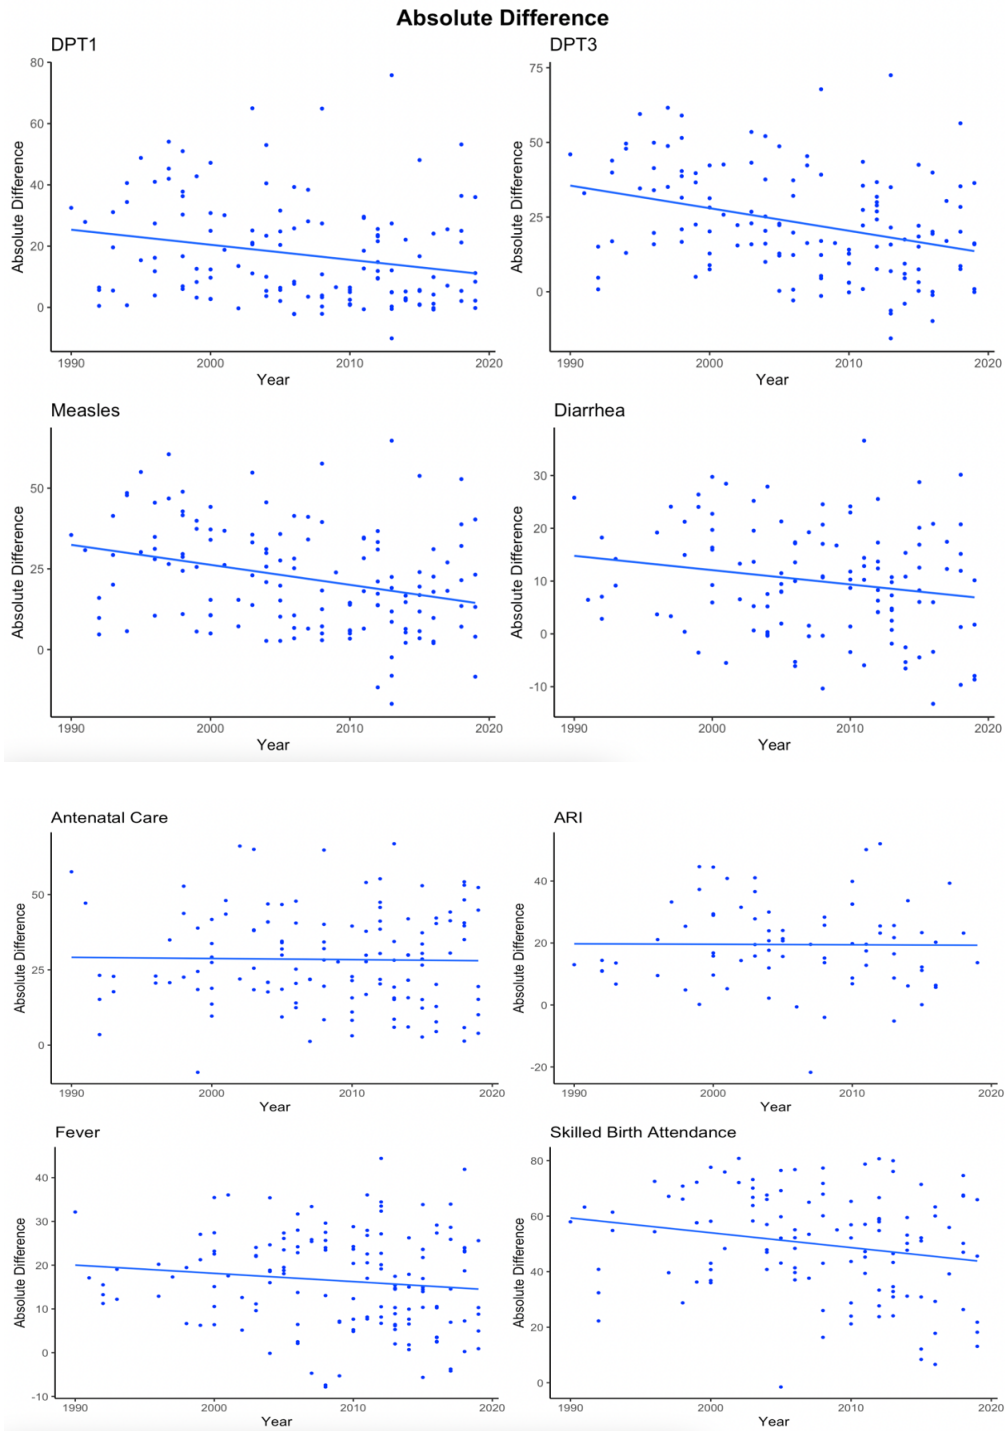

Note: The absolute difference is the difference between the top and bottom quintiles.



**Figure A4.** Relative differences and trends for eight indicators in sub-Saharan Africa, 1986-2019.

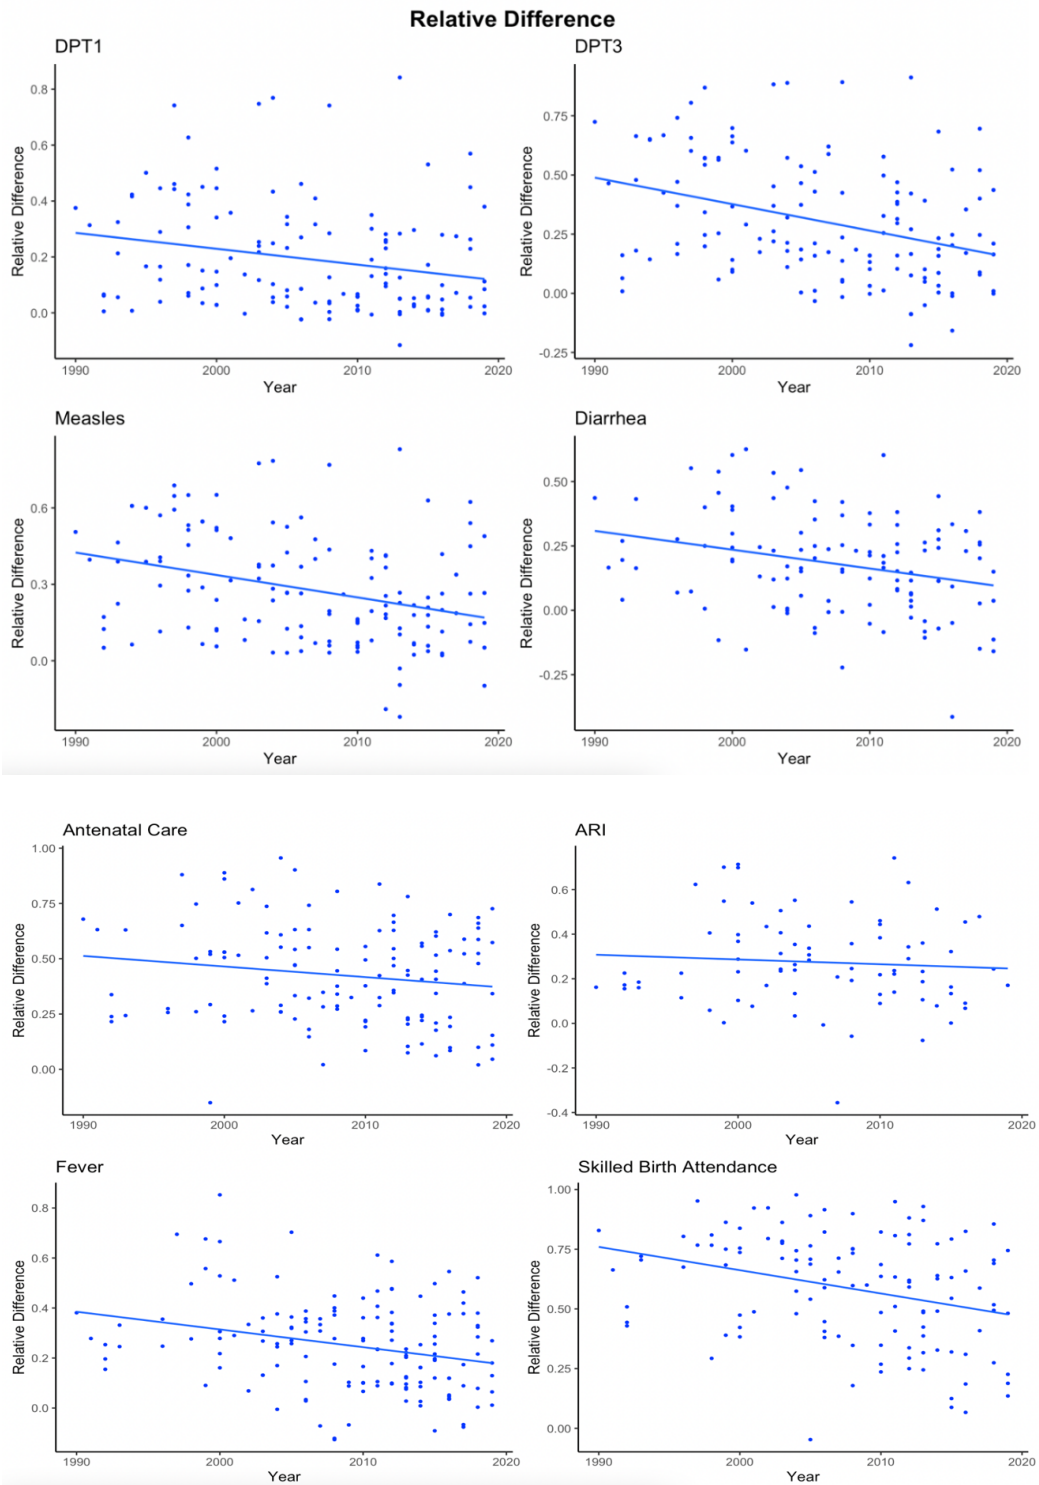

Note: The relative difference is the difference between the top and bottom quintiles divided by the top quintile.

**Figure A5.** Combined linear trends.

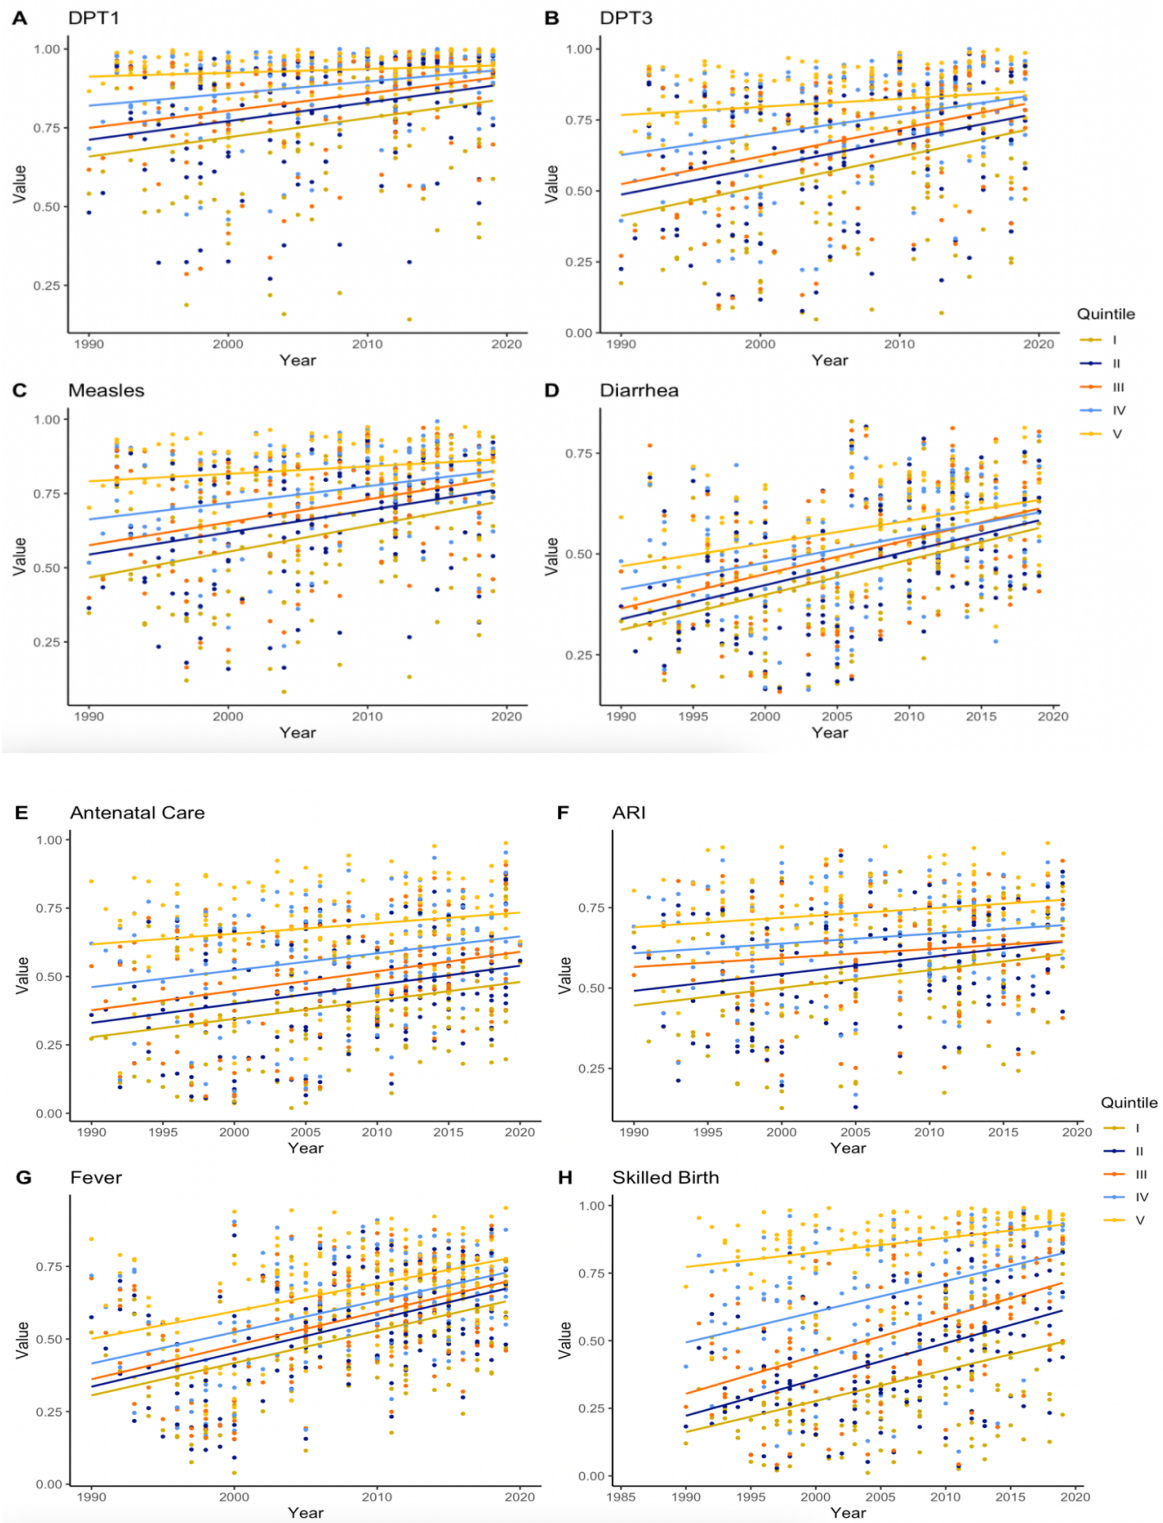

**Figure A6.** Density of the rate of change in coverage for the bottom quintile for eight indicators in sub-Saharan Africa, 1986 to 2019 for countries at least four surveys data points.

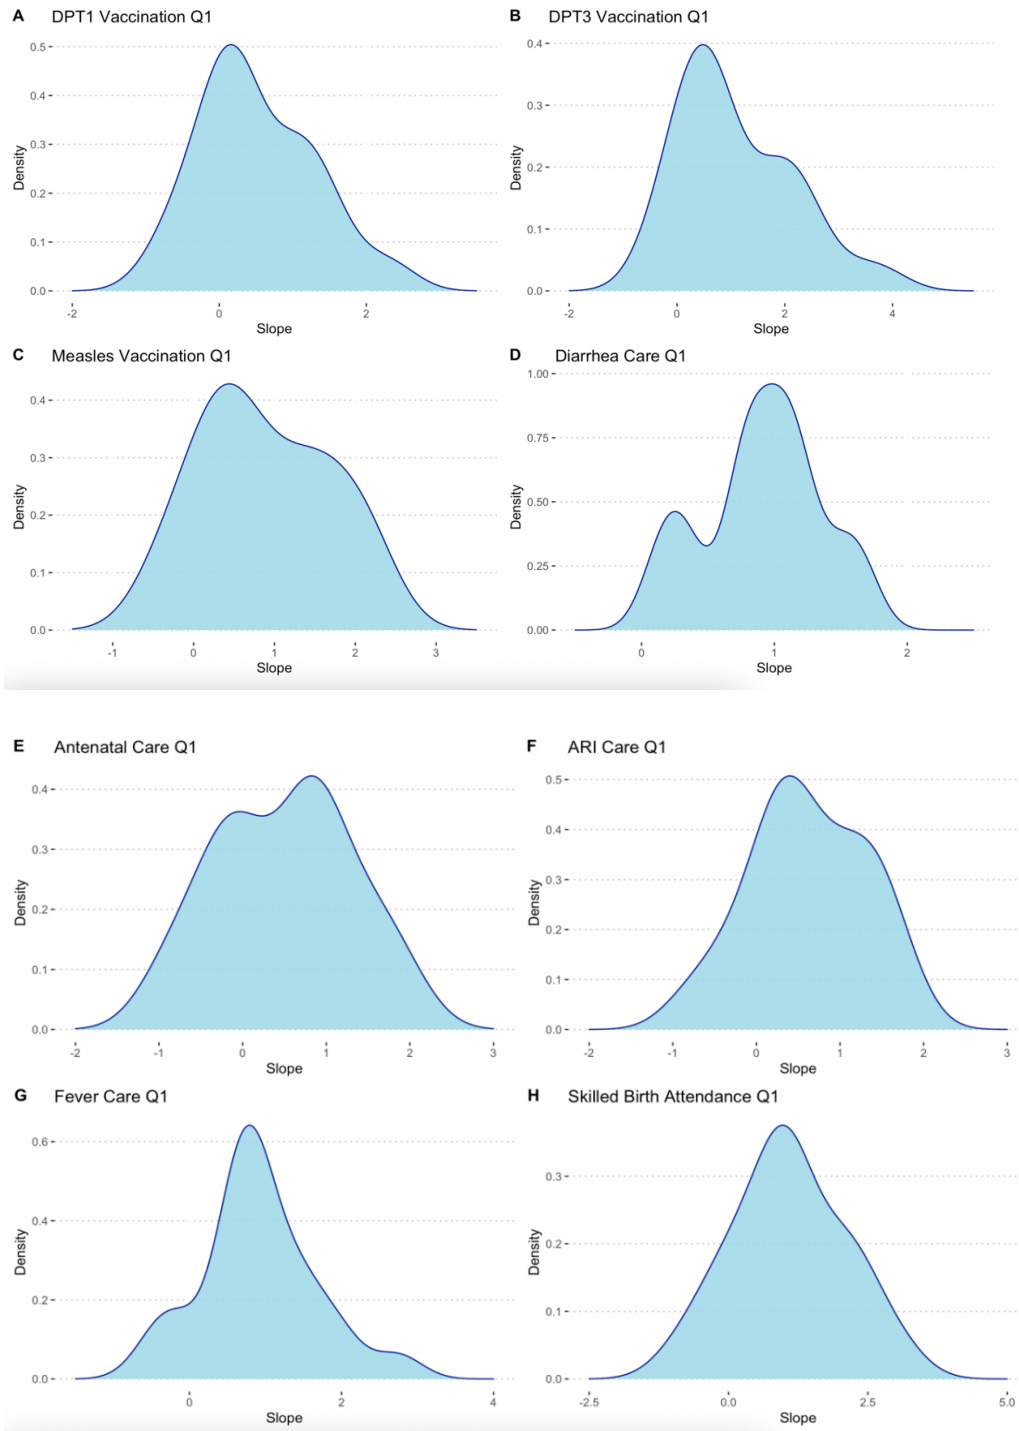

*DPT1* First-dose Diphtheria, Tetanus, Pertussis; *DPT3* Third-dose Diphtheria, Tetanus, Pertussis  
*ANC* Antenatal Care; *ARI* Acute Respiratory Infection; *SBA* Skilled Birth Attendance



**Figure A7.** Values of coefficient of variation and trends by quintile for eight indicators in sub-Saharan Africa, 1986-2019.

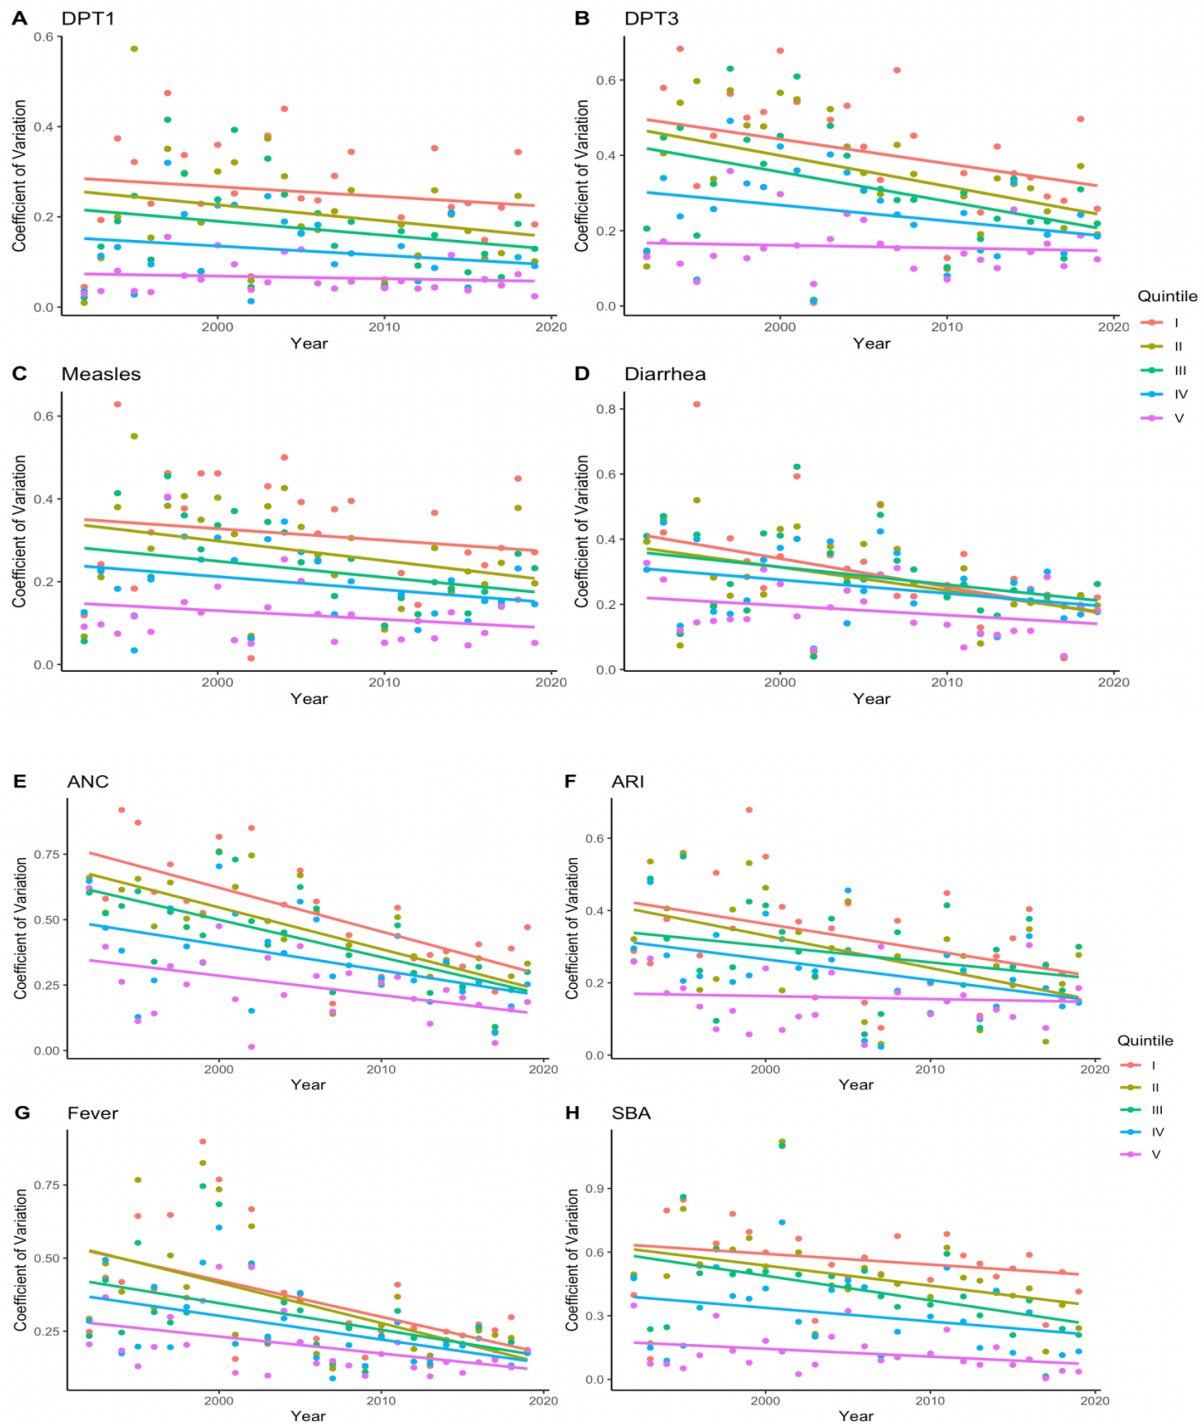

*DPT1* First-dose Diphtheria, Tetanus, Pertussis; *DPT3* Third-dose Diphtheria, Tetanus, Pertussis  
*ANC* Antenatal Care; *ARI* Acute Respiratory Infection; *SBA* Skilled Birth Attendance.

**Figure A8.** Five-year moving averages from 1986 to 2019 for eight indicators in sub-Saharan Africa with 25<sup>th</sup> and 75<sup>th</sup> percentile values.

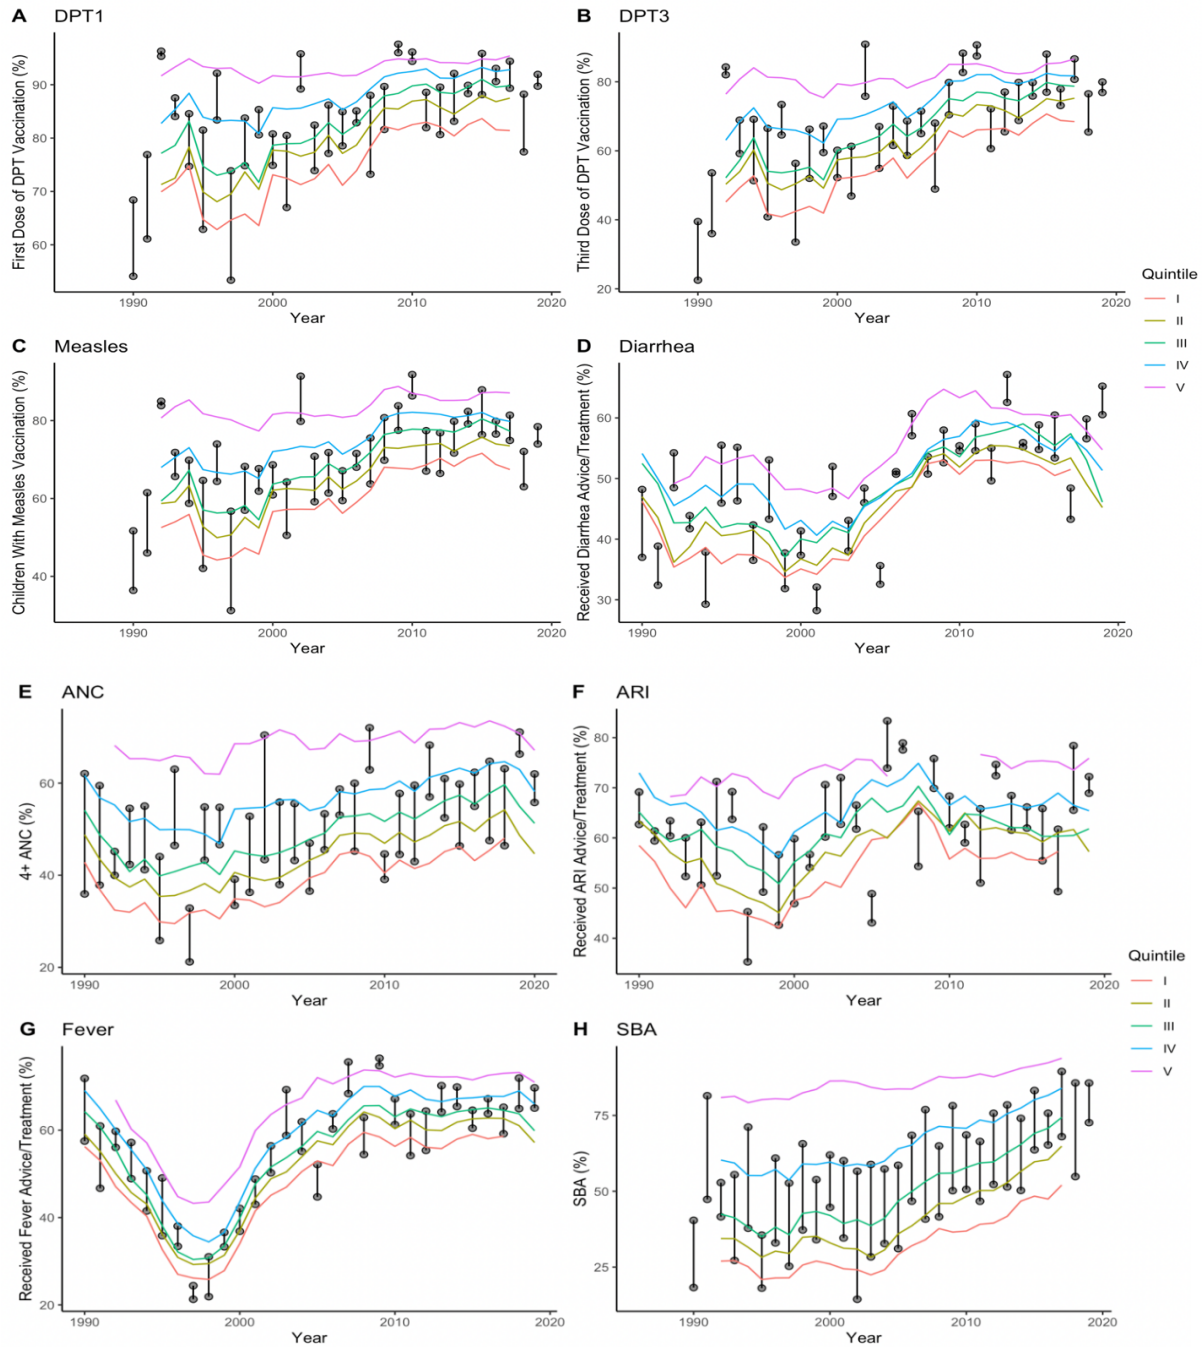

*DPT1* First-dose Diphtheria, Tetanus, Pertussis; *DPT3* Third-dose Diphtheria, Tetanus, Pertussis  
*ANC* Antenatal Care; *ARI* Acute Respiratory Infection; *SBA* Skilled Birth Attendance

**Figure A9.** Scatter plots and mean trends (1986-2019) for eight indicators in sub-Saharan Africa.

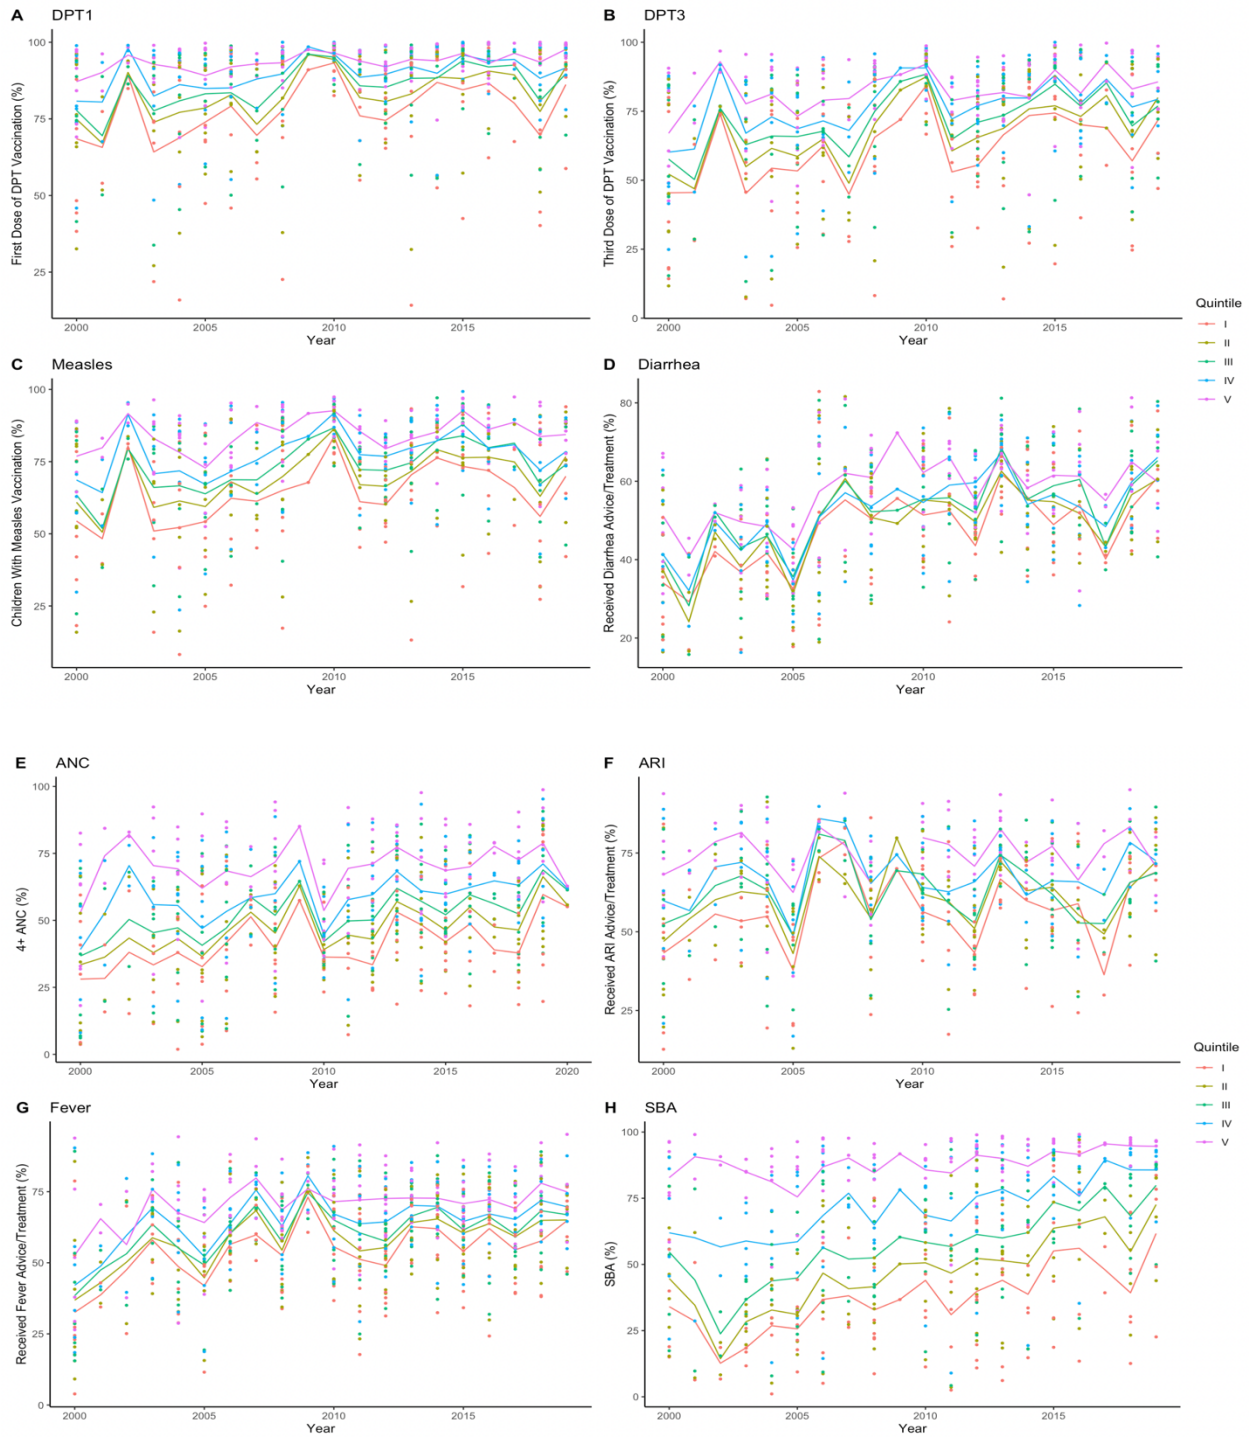

*DPT1* First-dose Diphtheria, Tetanus, Pertussis; *DPT3* Third-dose Diphtheria, Tetanus, Pertussis  
*ANC* Antenatal Care; *ARI* Acute Respiratory Infection; *SBA* Skilled Birth Attendance



**Figure A10.** Minimum and maximum values with five-year moving averages (1986-2019) for eight indicators in sub-Saharan Africa.

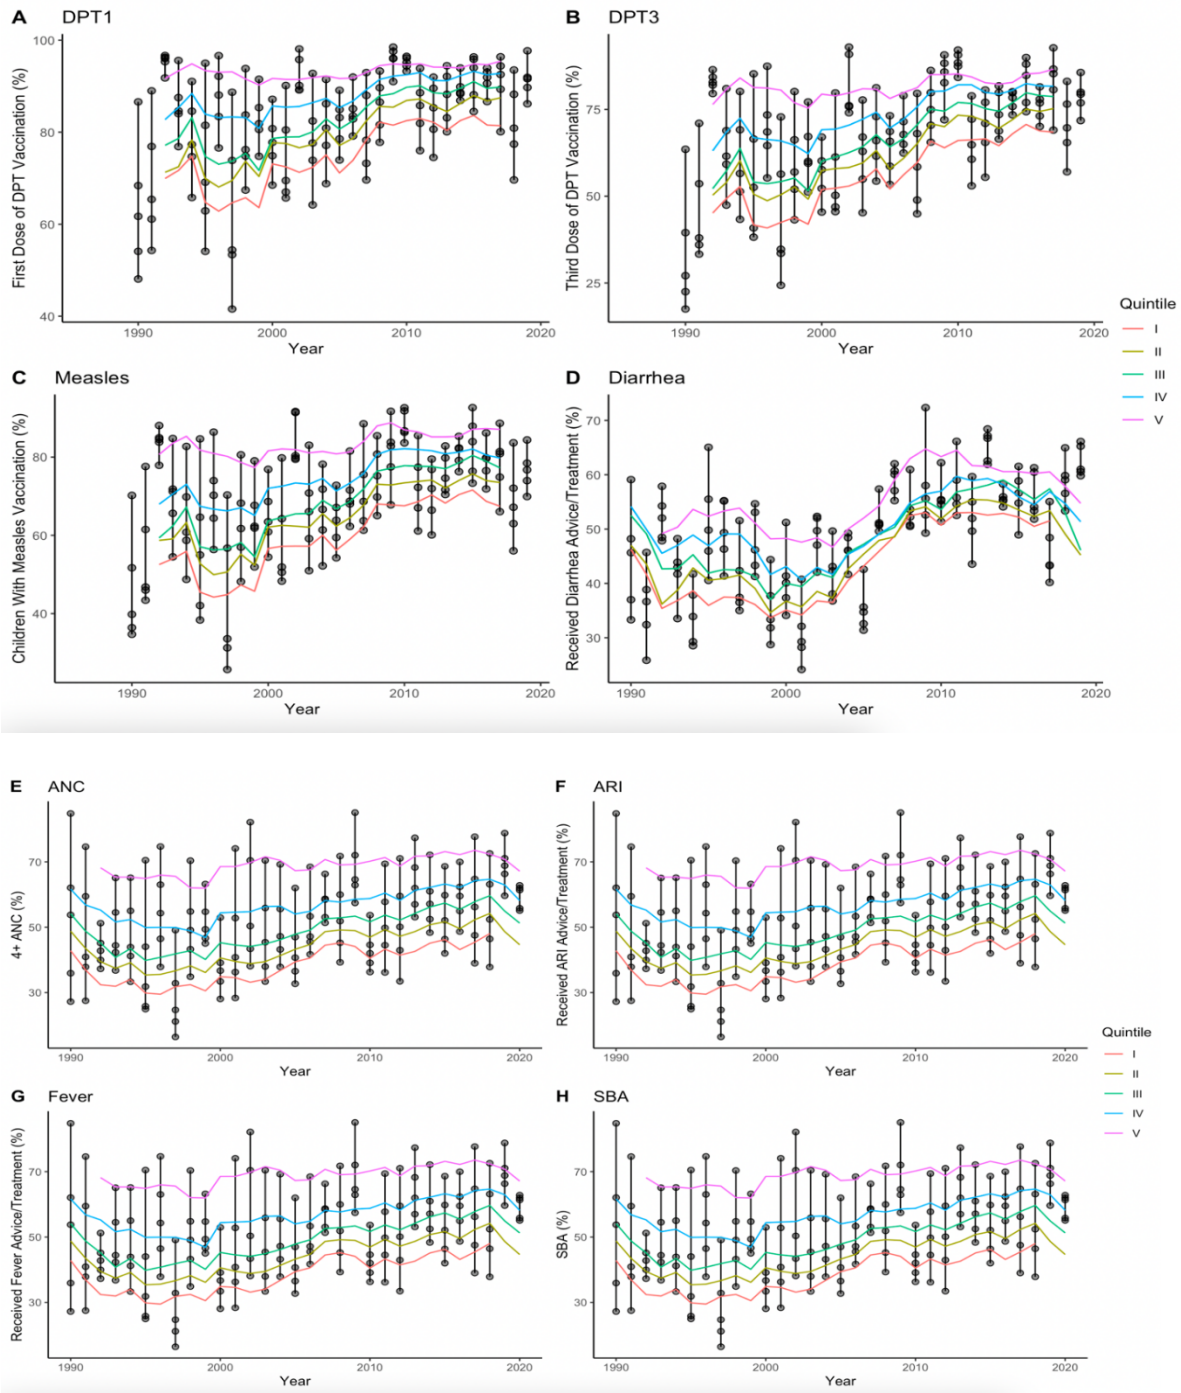

*DPT1* First-dose Diphtheria, Tetanus, Pertussis; *DPT3* Third-dose Diphtheria, Tetanus, Pertussis  
*ANC* Antenatal Care; *ARI* Acute Respiratory Infection; *SBA* Skilled Birth Attendance
